# Supplementary material for: Further Characterization of Glycine-Containing Microcystins from the McMurdo Dry Valleys of Antarctica
Source: MDPI journal article supplement (doi:10.3390/toxins7020493), 2015-02-10
Supplement: s1 [file s1]

## Supplementary Information

**Table S1.** High resolution mass spectrometry (HRMS) analysis of the Antarctic microcystins and mass deviations from the proposed structures.

| Microcystin                                                                                   | Measured $m/z$ <sup>a</sup> | Molecular Formula                                               | Calculated $m/z$ | Error (ppm) |
|-----------------------------------------------------------------------------------------------|-----------------------------|-----------------------------------------------------------------|------------------|-------------|
| [Gly <sup>1</sup> , Asp <sup>3</sup> , Dhb <sup>7</sup> ] MC-LR (3)                           | 967.5285                    | C <sub>47</sub> H <sub>71</sub> N <sub>10</sub> O <sub>12</sub> | 967.5247         | +3.86       |
| [Gly <sup>1</sup> , Asp <sup>3</sup> , Dhb <sup>7</sup> ] MC-LHar (4)                         | 981.5413                    | C <sub>48</sub> H <sub>73</sub> N <sub>10</sub> O <sub>12</sub> | 967.5404         | +0.87       |
| [Gly <sup>1</sup> , Asp <sup>3</sup> , ADMAdda <sup>5</sup> , Dhb <sup>7</sup> ] MC-LR (5)    | 995.5206                    | C <sub>48</sub> H <sub>71</sub> N <sub>10</sub> O <sub>13</sub> | 995.5197         | -0.94       |
| [Gly <sup>1</sup> , Asp <sup>3</sup> , ADMAdda <sup>5</sup> , Dhb <sup>7</sup> ] MC-LHar (6)  | 1009.5348                   | C <sub>49</sub> H <sub>73</sub> N <sub>10</sub> O <sub>13</sub> | 1,009.5353       | +0.47       |
| [Gly <sup>1</sup> , Asp <sup>3</sup> , Dhb <sup>7</sup> ] MC-RR (7)                           | 1010.5442                   | C <sub>47</sub> H <sub>72</sub> N <sub>13</sub> O <sub>12</sub> | 1,010.5418       | -2.44       |
| [Gly <sup>1</sup> , Asp <sup>3</sup> , Dhb <sup>7</sup> ] MC-RHar (8)                         | 1024.5569                   | C <sub>48</sub> H <sub>74</sub> N <sub>13</sub> O <sub>12</sub> | 1,024.5574       | +0.53       |
| [Gly <sup>1</sup> , Asp <sup>3</sup> , ADMAdda <sup>5</sup> , Dhb <sup>7</sup> ] MC-RR (9)    | 1038.5405                   | C <sub>48</sub> H <sub>72</sub> N <sub>13</sub> O <sub>13</sub> | 1,038.5367       | -3.82       |
| [Gly <sup>1</sup> , Asp <sup>3</sup> , ADMAdda <sup>5</sup> , Dhb <sup>7</sup> ] MC-RHar (10) | 1052.5541                   | C <sub>49</sub> H <sub>74</sub> N <sub>13</sub> O <sub>13</sub> | 1,052.5524       | -1.60       |

<sup>a</sup> All HRMS measurements were made using the singularly-protonated molecular ion.

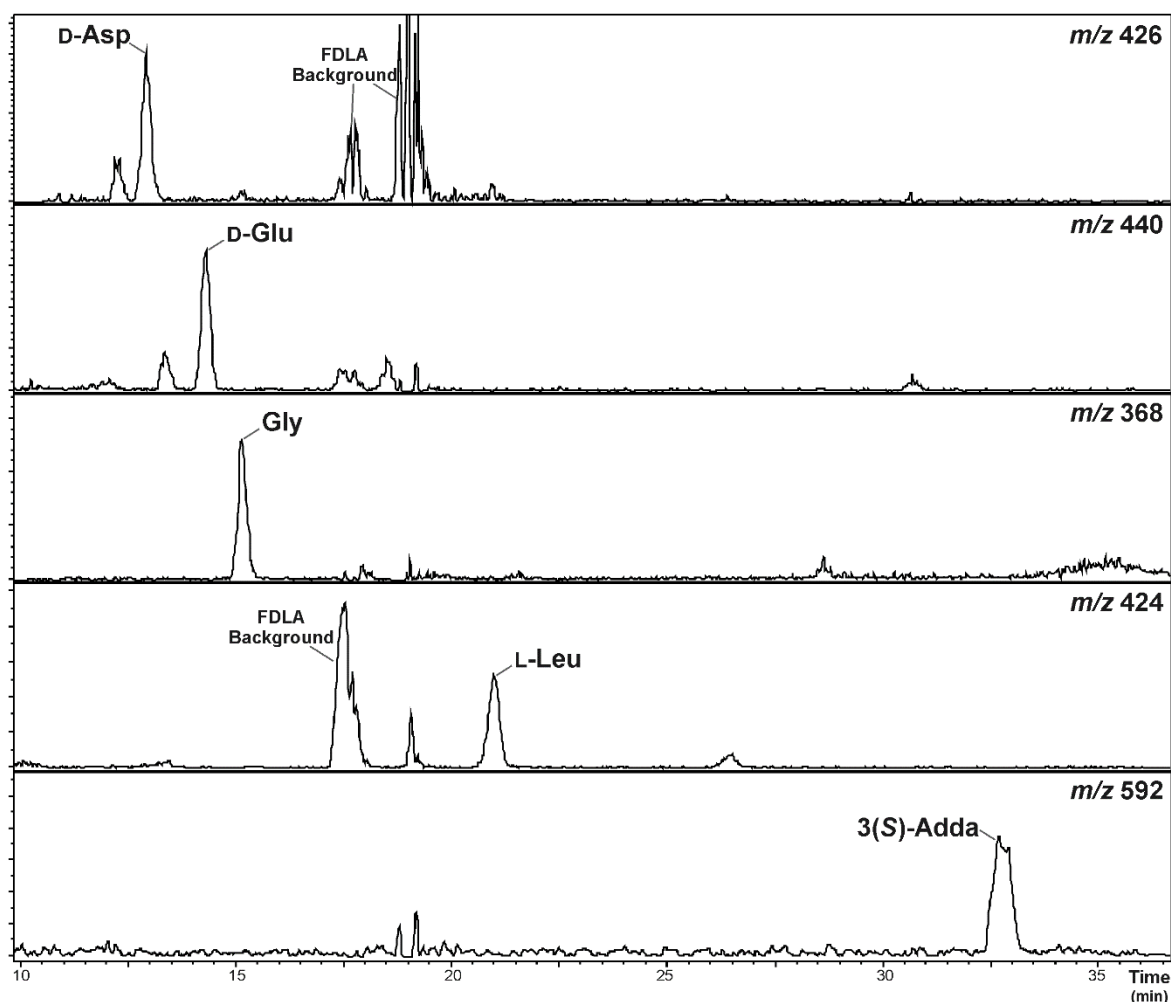

**Figure S1.** Advanced Marfey's amino acid analysis of the Antarctic-LR microcystin congeners; extracted ion chromatograms of hydrolysates derivatized with L-FDLA (1-fluoro-2,4-dinitrophenyl-5-leucine).

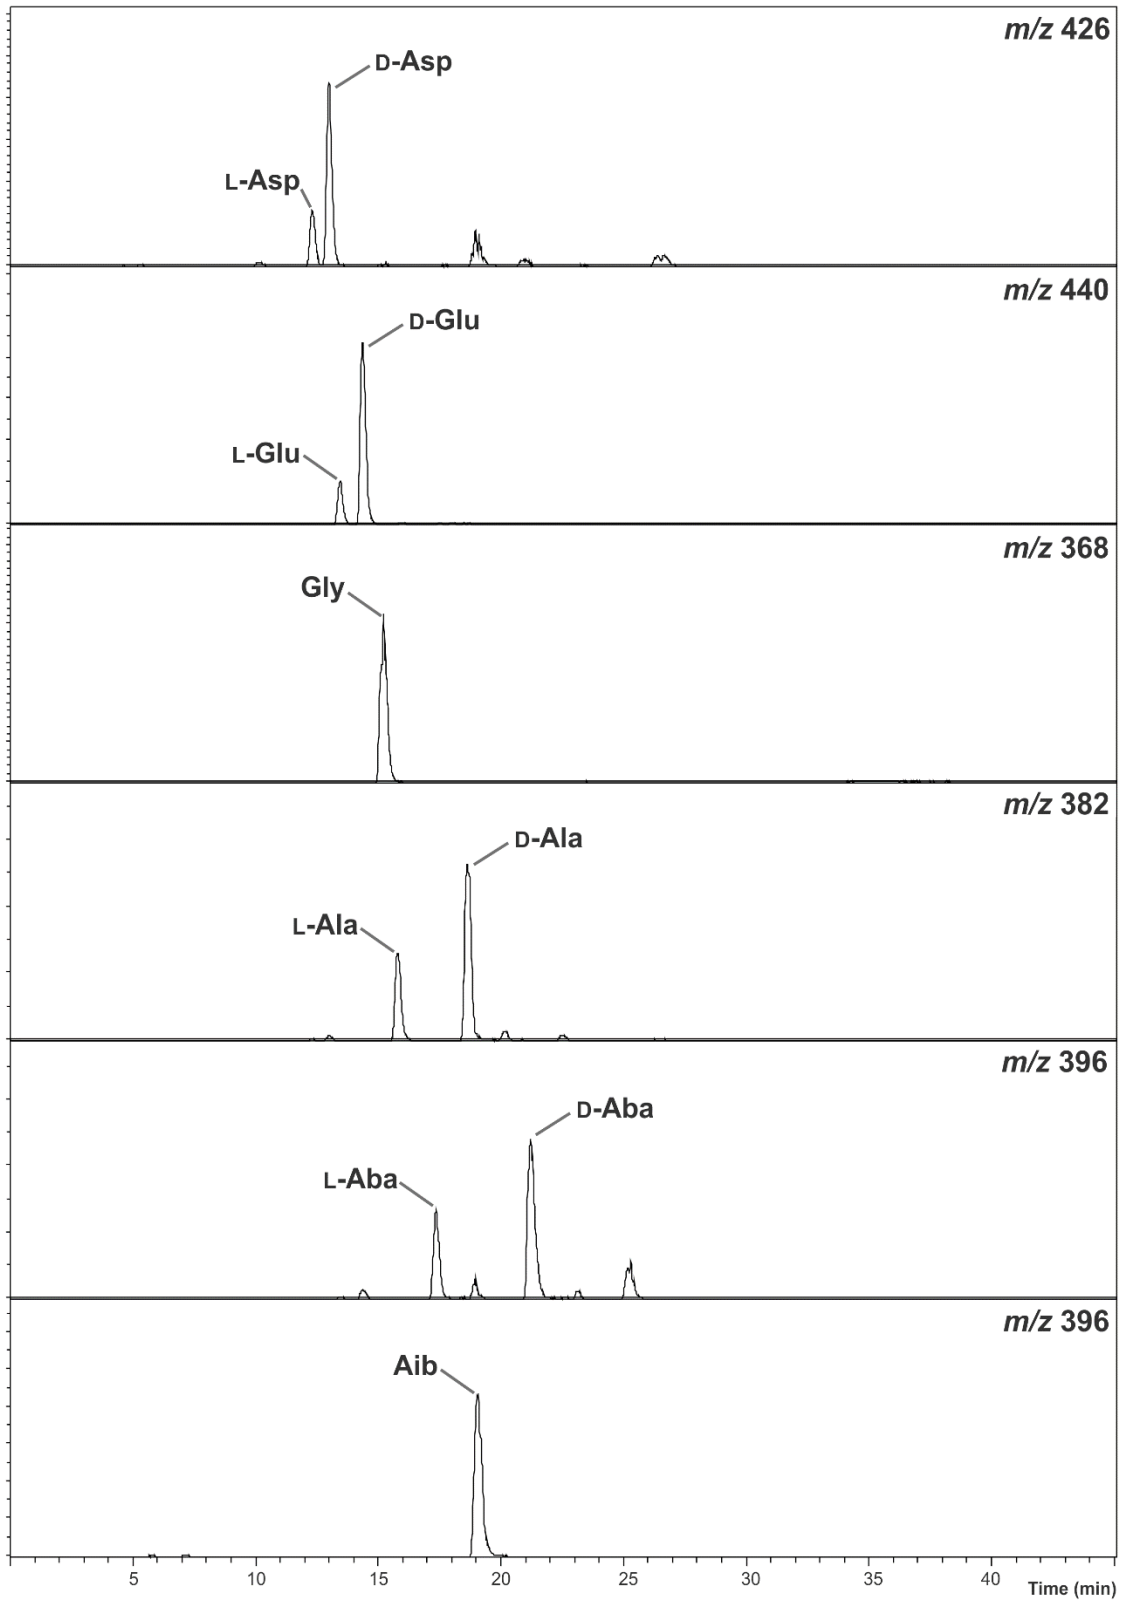

Figure S2. Cont.

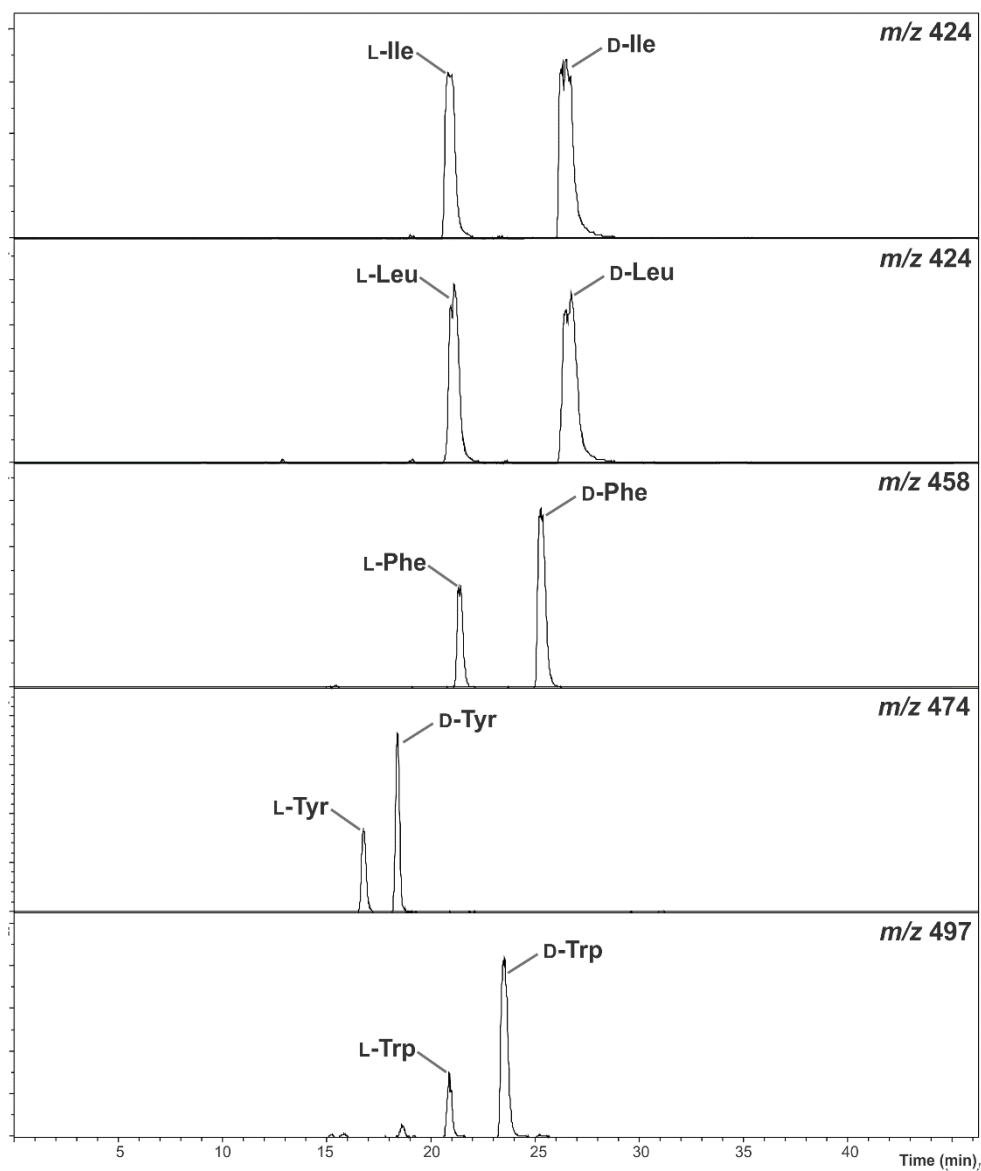

**Figure S2.** Advanced Marfey's amino acid analysis of standard amino acids; extracted ion chromatograms of amino acids derivatized with DL-FDLA.

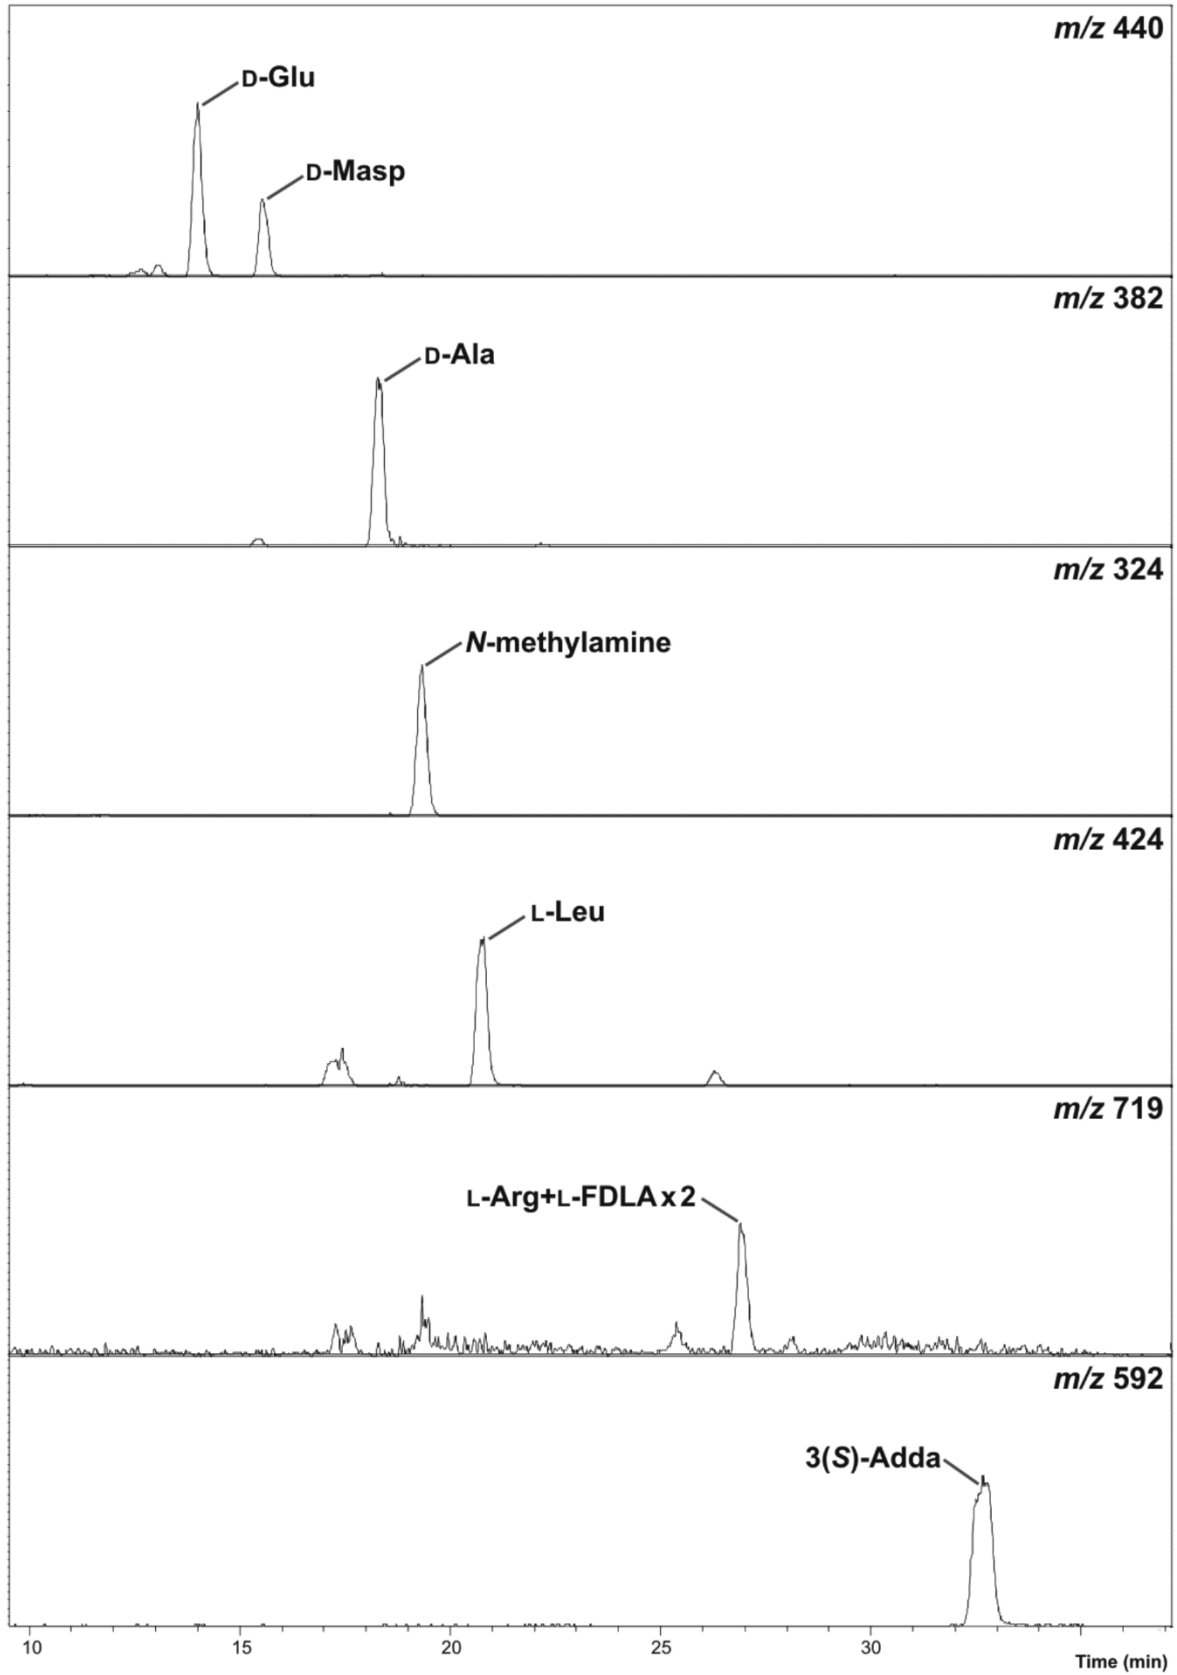

**Figure S3.** Advanced Marfey's amino acid analysis of MC-LR; extracted ion chromatograms of hydrolyzed MC-LR derivatized with L-FDLA.

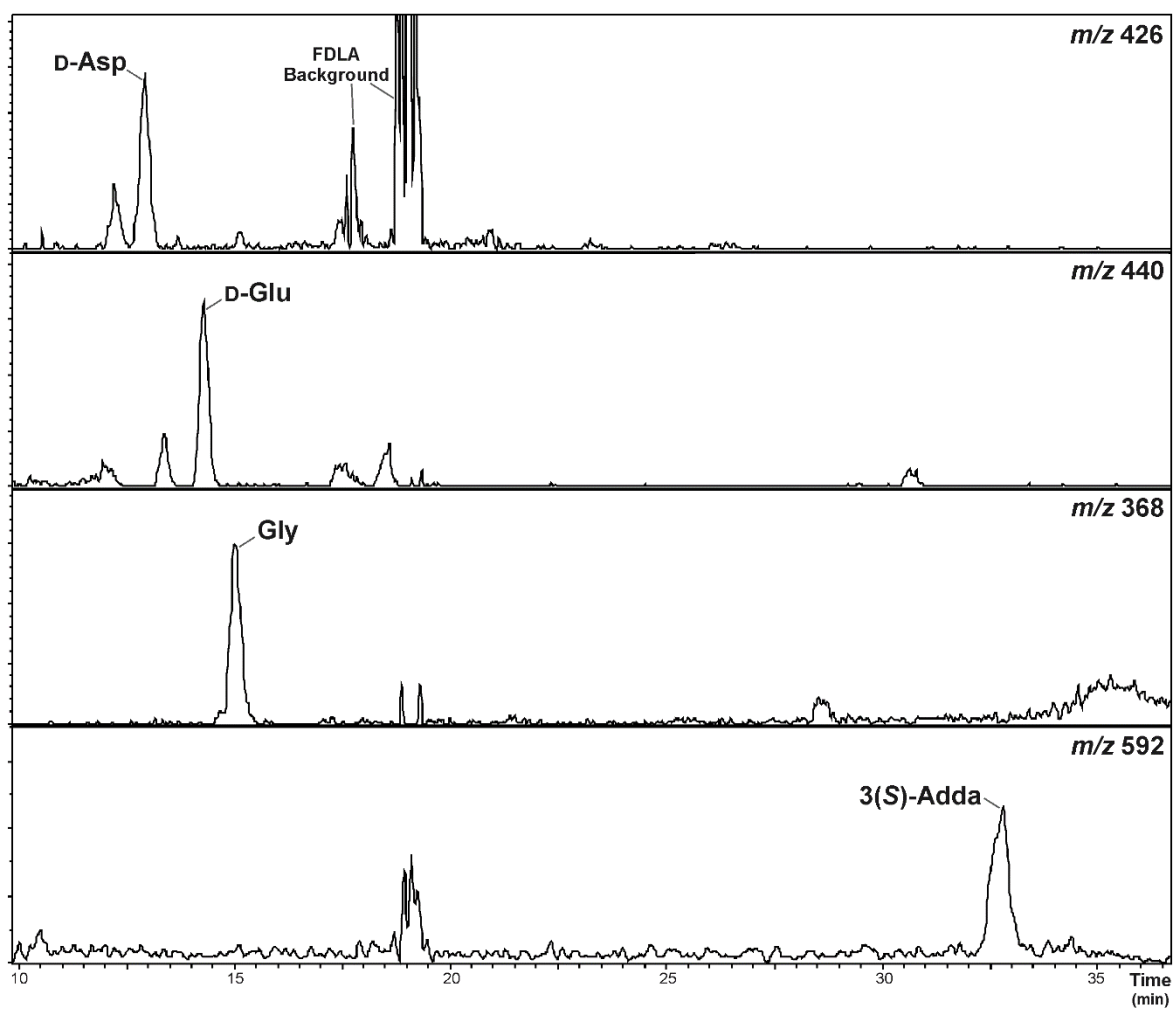

**Figure S4.** Advanced Marfey's amino acid analysis of the Antarctic-RR microcystin congeners; extracted ion chromatograms of hydrolyzates derivatized with L-FDLA.
